# Supplementary material for: Novel Autoantigens Associated with Lupus Nephritis
Source: PubMed Central journal article supplement (PMC4476694; doi:10.1371/journal.pone.0126564), 2015-06-22
Supplement: pone.0126564.s011.pdf [file pone.0126564.s011.pdf]

**Table S1. Clinical and laboratory data of 11 LN patients.**

|                                                     | LN1                                            | LN2                               | LN3                        | LN4                                        | LN5                                           | LN6                       | LN7                  | LN8                                | LN9                                | LN10                                               | LN11                         |
|-----------------------------------------------------|------------------------------------------------|-----------------------------------|----------------------------|--------------------------------------------|-----------------------------------------------|---------------------------|----------------------|------------------------------------|------------------------------------|----------------------------------------------------|------------------------------|
| Age (yr)                                            | 20                                             | 43                                | 57                         | 21                                         | 42                                            | 30                        | 45                   | 45                                 | 61                                 | 25                                                 | 28                           |
| Sex                                                 | F                                              | F                                 | F                          | F                                          | F                                             | F                         | F                    | F                                  | F                                  | M                                                  | F                            |
| Disease duration (yr)                               | 2                                              | 0.3                               | 1                          | 0.1                                        | 10                                            | 0.1                       | 4                    | 2                                  | 31                                 | 6                                                  | 14                           |
| SLEDAI score                                        | 20                                             | 10                                | 18                         | 20                                         | 16                                            | 16                        | 10                   | 8                                  | 6                                  | 4                                                  | 8                            |
| Antinuclear antibody <sup>#</sup>                   | 1:640                                          | 1:640                             | 1:2560                     | 1:640                                      | 1:640                                         | 1:2560                    | 1:10240              | 1:2560                             | 1:40                               | 1:160                                              | 1:640                        |
|                                                     | sp                                             | sp                                | ho+sp                      | ho                                         | ho+sp                                         | ho                        | sp+cyto              | ho+sp                              | ho                                 | ho+sp                                              | ho+sp                        |
| Anti-dsDNA antibodies (IU/ml)<br>(normal range <12) | 66                                             | 25                                | 65                         | 194                                        | 378                                           | 710                       | 49                   | 90                                 | 5.9                                | 2.4                                                | 59                           |
| Other positive antibodies* <sup>1</sup>             | anti-Sm                                        | anti-Sm<br>anti-β2 GPI<br>aCL-IgG | anti-SSA<br>anti-SSB       | anti-SSA<br>aCL-IgG                        | anti-Sm<br>anti-SSA<br>anti-β2 GPI<br>aCL-IgG | anti-SSA                  | anti-Sm<br>aCL-IgG   | anti-Sm<br>anti-β2 GPI<br>aCL-IgG  | anti-SSA                           | anti-Sm<br>aCL-IgG<br>anti-β2GPI                   | anti-Sm<br>anti-SSA          |
| C3 (mg/dl)<br>(normal range 65-135)                 | 23                                             | 38                                | 22                         | 24                                         | 22                                            | 20                        | 50                   | 41                                 | 60                                 | 108                                                | 60                           |
| C4 (mg/dl)<br>(normal range 13-35)                  | 2.5                                            | 4.4                               | 2.5                        | 4.1                                        | 3.7                                           | 2.7                       | 4.2                  | 6                                  | 11                                 | 23                                                 | 8.9                          |
| WBC (/ $\mu$ l)                                     | 7700                                           | 2500                              | 2400                       | 1300                                       | 4600                                          | 3900                      | 3700                 | 5300                               | 6200                               | 9600                                               | 6500                         |
| Platelet ( $\times 10^4$ / $\mu$ l)                 | 8.2                                            | 23.4                              | 10.7                       | 24.5                                       | 15.3                                          | 16.2                      | 21.3                 | 28.5                               | 18.6                               | 31.5                                               | 34.9                         |
| Urine protein (g/day)                               | 1.1                                            | 0.7                               | 1.98                       | 2.4                                        | 1.3                                           | 2.18                      | 3.59                 | 0.5                                | 1.45                               | 1.1                                                | 0.84                         |
| Urine sedimentation                                 | n.a.d.                                         | n.a.d.                            | RBC 10/HPF                 | RBC 10/HPF                                 | WBC 40/HPF<br>Waxy casts<br>WBC casts         | RBC 100/HPF               | n.a.d.               | n.a.d.                             | n.a.d.                             | n.a.d.                                             | RBC 7.4/HPF                  |
| CRP (mg/dl)                                         | 0.43                                           | 0.05                              | 0.53                       | 0.35                                       | 0.18                                          | 0.08                      | 0.29                 | 0.05                               | 0.18                               | 0.03                                               | 0.06                         |
| Creatinine (mg/dl)                                  | 0.47                                           | 0.51                              | 0.8                        | 0.47                                       | 0.75                                          | 0.6                       | 0.53                 | 0.5                                | 0.46                               | 1.43                                               | 0.56                         |
| Pathologic classification                           | III(A)+V                                       | III(A)                            | IV-G(A)+V                  | II                                         | III(A)+V                                      | III(A/C)                  | V                    | n.e.                               | n.e.                               | n.e.                                               | n.e.                         |
| Manifestations                                      | Fever,<br>Depression,<br>Livedo<br>reticularis | Fever                             | Arthritis,<br>Pericarditis | Fever,<br>Rash,<br>Alopecia,<br>Arthralgia | Oral ulcers,<br>Malar rash                    | Oral ulcers,<br>Arthritis | Pericarditis,<br>ILD | (past)<br>Malar rash,<br>Arthritis | (past)<br>Arthritis,<br>anti-dsDNA | (past)<br>Arthritis,<br>Neutropenia,<br>anti-dsDNA | (past)<br>Rash,<br>Arthritis |

<sup>#</sup> ho; homogeneous, sp; speckled, cyto; cytoplasmic

\*1 We examined the following autoantibodies; Sm, SSA, SSB, cardiolipin (CL) and β2 glycoprotein I (GPI).

LN; lupus nephritis, ILD; interstitial lung disease, n.a.d.; no abnormality detected, n.e.: not examined
