# Supplementary material for: Novel Autoantigens Associated with Lupus Nephritis
Source: PubMed Central journal article supplement (PMC4476694; doi:10.1371/journal.pone.0126564), 2015-06-22
Supplement: pone.0126564.s012.pdf [file pone.0126564.s012.pdf]

**Table S2. Clinical and laboratory data of patient A and B.**

|                                                     | Patient A (LN2)                    |          | Patient B (SLE3)                               |          |
|-----------------------------------------------------|------------------------------------|----------|------------------------------------------------|----------|
|                                                     | active                             | inactive | active                                         | inactive |
| Age (yr)                                            | 43                                 | 44       | 25                                             | 26       |
| Disease duration (yr)                               | 0.3                                | 0.8      | 0.3                                            | 1        |
| SLEDAI score                                        | 10                                 | 4        | 14                                             | 4        |
| Anti-dsDNA antibodies (IU/ml)<br>(normal range <12) | 25                                 | 49       | 495                                            | 51       |
| C3 (mg/dl)<br>(normal range 65-135)                 | 38                                 | 46       | 43                                             | 69       |
| C4 (mg/dl)<br>(normal range 13-35)                  | 4.4                                | 6.4      | <1.7                                           | 3.1      |
| WBC (/μl)                                           | 2500                               | 5900     | 2300                                           | 5300     |
| Platelet (×10 <sup>4</sup> /μl)                     | 23.4                               | 22.5     | 13.2                                           | 17.5     |
| Urine protein (g/day)                               | 0.7                                | 0        | 0                                              | 0.01     |
| Urine sedimentation                                 | n.a.d.                             | n.a.d.   | n.a.d.                                         | n.a.d.   |
| CRP (mg/dl)                                         | 0.05                               | 0.05     | 0.29                                           | 0.01     |
| Creatinine (mg/dl)                                  | 0.51                               | 0.55     | 0.45                                           | 0.62     |
| Manifestations                                      | Fever<br>Nephritis<br>(Class IIIA) |          | Fever<br>Arthritis<br>Pericarditis<br>Pleurisy |          |

Patient A (LN2); Nephritis (Class III(A)), Patient B (SLE3); Serositis (without nephritis).  
n.a.d.; no abnormality detected.
