# Supplementary material for: Novel Autoantigens Associated with Lupus Nephritis
Source: PubMed Central journal article supplement (PMC4476694; doi:10.1371/journal.pone.0126564), 2015-06-22
Supplement: pone.0126564.s013.pdf [file pone.0126564.s013.pdf]

**Table S3. Clinical and laboratory data of 20 patients analyzed with immunoprecipitation.**

|                                                     | SLE1                                                   | SLE2                               | SLE3                                              | SLE4                               | SLE5                                     |
|-----------------------------------------------------|--------------------------------------------------------|------------------------------------|---------------------------------------------------|------------------------------------|------------------------------------------|
| Age (yr)                                            | 39                                                     | 41                                 | 25                                                | 40                                 | 22                                       |
| Sex                                                 | F                                                      | F                                  | F                                                 | F                                  | F                                        |
| Disease duration (yr)                               | 0.1                                                    | 0.1                                | 0.3                                               | 10                                 | 11                                       |
| SLEDAI score                                        | 12                                                     | 16                                 | 14                                                | 4                                  | 2                                        |
| Antinuclear antibody <sup>#</sup>                   | 1:2560                                                 | 1:10240                            | 1:10240                                           | 1:2560                             | 1:2560                                   |
| Anti-dsDNA antibodies (IU/ml)<br>(normal range <12) | ho                                                     | ho                                 | sp                                                | sp                                 | ho                                       |
| Other positive antibodies* <sup>1</sup>             | anti-SSA<br>anti-SSB<br>aCL-IgG                        | anti-SSA<br>anti-SSB               | anti-Sm<br>anti-SSA<br>anti-SSB                   | anti-SSA<br>anti-β2 GPI<br>aCL-IgG | anti-β2 GPI<br>aCL-IgG                   |
| C3 (mg/dl)<br>(normal range 65-135)                 | 16                                                     | 55                                 | 43                                                | 67                                 | 79                                       |
| C4 (mg/dl)<br>(normal range 13-35)                  | 1.8                                                    | 28                                 | <1.7                                              | 4.5                                | 5.9                                      |
| WBC (/ $\mu$ l)                                     | 2300                                                   | 2700                               | 2300                                              | 3800                               | 6600                                     |
| Platelet ( $\times 10^4$ / $\mu$ l)                 | 16.3                                                   | 24.5                               | 13.2                                              | 19.5                               | 22.8                                     |
| Urine protein (g/day)                               | 0.15                                                   | 0                                  | 0                                                 | 0.095                              | 0                                        |
| Urine sedimentation                                 | RBC 4.5/HPF<br>WBC 1.7/HPF                             | n.a.d.                             | n.a.d.                                            | n.a.d.                             | n.a.d.                                   |
| CRP (mg/dl)                                         | 0.03                                                   | 0.71                               | 0.29                                              | 0.1                                | 0.04                                     |
| Creatinine (mg/dl)                                  | 0.68                                                   | 0.44                               | 0.45                                              | 0.42                               | 0.55                                     |
| Manifestations                                      | Fever,<br>Malar rash,<br>Chilblain lupus,<br>Arthritis | Fever,<br>Malar rash,<br>Psychosis | Fever,<br>Arthritis,<br>Pericarditis,<br>Pleurisy | Lymphopenia,<br>Photosensitivity   | Hemolytic<br>anemia,<br>Photosensitivity |

  

|                                       | DM/PM1                 | DM/PM2               | DM/PM3                                             | DM/PM4                                | DM/PM5                                                                       |
|---------------------------------------|------------------------|----------------------|----------------------------------------------------|---------------------------------------|------------------------------------------------------------------------------|
| Age (yr)                              | 30                     | 31                   | 65                                                 | 63                                    | 60                                                                           |
| Sex                                   | F                      | F                    | F                                                  | M                                     | F                                                                            |
| Disease duration (yr)                 | 0.3                    | 0.3                  | 0.2                                                | 0.5                                   | 24                                                                           |
| CK (IU/l)                             | 3212                   | 10635                | 1949                                               | 4049                                  | 876                                                                          |
| Antinuclear antibody                  | negative               | negative             | negative                                           | negative                              | negative                                                                     |
| Positive autoantibodies* <sup>2</sup> | anti-Jo1<br>anti-SSA   | anti-SRP<br>anti-SSA | anti-Jo1                                           | n.a.d.                                | anti-Jo1                                                                     |
| Manifestations                        | Gottron's sign,<br>ILD | Gottron's<br>papules | Gottron's sign,<br>Cuticular<br>overgrowth,<br>ILD | Gottron's sign,<br>Shawl sign,<br>ILD | Gottron's<br>papules,<br>Periungual<br>erythema,<br>Calcinosis cutis,<br>ILD |

  

|                                       | SSc1                                                      | SSc2            | SSc3            | SSc4                      | SSc5              |
|---------------------------------------|-----------------------------------------------------------|-----------------|-----------------|---------------------------|-------------------|
| Age (yr)                              | 69                                                        | 73              | 61              | 63                        | 54                |
| Sex                                   | F                                                         | F               | F               | F                         | F                 |
| Disease duration (yr)                 | 12                                                        | 4               | 0.4             | 3                         | 9                 |
| Antinuclear antibody <sup>#</sup>     | 1:2560                                                    | 1:160           | 1:640           | 1:1280                    | 1:40              |
| Positive autoantibodies* <sup>3</sup> | anti-Scl70                                                | anti-Scl70      | anti-Scl70      | dis-sp<br>anti-centromere | ho+cyto<br>n.a.d. |
| Skin thickening                       | face, forearms,<br>upper arms,<br>hands, thighs,<br>trunk | hands, forearms | hands, forearms | face, hands,<br>forearms  | hands, forearms   |
| Manifestations                        | Calcinosis cutis,<br>ILD, CIPO                            | ILD             | ILD             |                           | ILD, PH           |

Five LN patients in this experiment are LN1 to LN5 (shown in Table S1).

<sup>#</sup> ho; homogeneous, sp; speckled, dis-sp; discrete-speckled, cyto; cytoplasmic

\*1 We examined the following autoantibodies; Sm, SSA, SSB, cardiolipin (CL) and β2 glycoprotein I (GPI).

\*2 We examined the following autoantibodies; SSA, Jo1, M2 (PDC-E2, BCOADC-E2, OGDC-E2), PM-Scl-100, PL-7, PL-12, Mi-2, Ku (p70/80), SRP and Rib-P.

\*3 We examined anti-Scl70 and anti-centromere antibodies.

LN; lupus nephritis, SLE; systemic lupus erythematosus, DM/PM; dermatomyositis / polymyositis, SSc; systemic sclerosis. ILD; interstitial lung disease, CIPO; chronic intestinal pseudo-obstruction, PH; pulmonary hypertension, n.a.d.; no abnormality detected.
