# Supplementary material for: Novel Autoantigens Associated with Lupus Nephritis
Source: PubMed Central journal article supplement (PMC4476694; doi:10.1371/journal.pone.0126564), 2015-06-22
Supplement: pone.0126564.s014.pdf [file pone.0126564.s014.pdf]

**Table S4. Information on 238 patients and 41 healthy individuals analyzed with ELISA.**

|                                 | n  | Female ratio (%) | Age (yr)    | Disease duration (yr) |
|---------------------------------|----|------------------|-------------|-----------------------|
| Lupus nephritis                 | 11 | 90.9             | 37.9 ± 14.1 | 6.4 ± 9.3             |
| SLE without nephritis           | 64 | 90.6             | 43.7 ± 17.1 | 10.7 ± 8.3            |
| Dermatomyositis / polymyositis  | 30 | 86.7             | 57.6 ± 16.2 | 8.9 ± 9.7             |
| Systemic sclerosis              | 16 | 100              | 58.9 ± 10.4 | 8.7 ± 6.3             |
| Mixed connective tissue Disease | 15 | 93.3             | 45.5 ± 12.3 | 7.3 ± 4.9             |
| Rheumatoid arthritis            | 55 | 69.1             | 63.8 ± 13.9 | 7.8 ± 9.5             |
| Sjögren syndrome                | 12 | 100              | 50.6 ± 16.9 | 7.3 ± 5.8             |
| Behçet's disease                | 22 | 31.8             | 48.1 ± 12.1 | 7.9 ± 5.5             |
| ANCA-associated vasculitis      | 13 | 53.8             | 64.5 ± 13.3 | 4.3 ± 2.6             |
| Healthy controls                | 41 | 68.3             | 35.4 ± 17.1 |                       |

SLE; systemic lupus erythematosus, ANCA; anti-neutrophil cytoplasmic antibody.
